# Supplementary material for: Mental Health Benefits of Long-Term Exposure to Residential Green and Blue Spaces: A Systematic Review
Source: Int J Environ Res Public Health. 2015 Apr 22;12(4):4354–79. doi: 10.3390/ijerph120404354 (PMC4410252; doi:10.3390/ijerph120404354)
Supplement: Supplementary File 1 [file ijerph-12-04354-s001.pdf]

# Mental Health Benefits of Long-Term Exposure to Residential Green and Blue Spaces: A Systematic Review

---

|                                                                                                                                                            |         |
|------------------------------------------------------------------------------------------------------------------------------------------------------------|---------|
| <b>Table S1.</b> Additional characteristics and quality scores of the studies included in the systematic review on green and blue spaces and mental health | Page S2 |
| <b>Table S2.</b> Final criteria for quality assessment of the studies                                                                                      | Page S7 |
| <b>Table S3.</b> Specific scores for each item evaluated and the final quality scores and categories given to each study                                   | Page S8 |

**Table S1.** Additional characteristics of the studies included in the systematic review on green and blue spaces and mental health.

| Author Country)                           | (Year, Study Design/Population (N))        | Statistical Methods                   | Co-Variables of Adjustment and Interactions Evaluated                                                                                                                                                                                                                                                                                       | Other Information                                                                                                                                                                                                                                                                                                                                                                         |
|-------------------------------------------|--------------------------------------------|---------------------------------------|---------------------------------------------------------------------------------------------------------------------------------------------------------------------------------------------------------------------------------------------------------------------------------------------------------------------------------------------|-------------------------------------------------------------------------------------------------------------------------------------------------------------------------------------------------------------------------------------------------------------------------------------------------------------------------------------------------------------------------------------------|
| Alcock <i>et al.</i> 2014, The UK [1]     | Longitudinal Adults (N = 1064)             | Fixed effects regression              | <ul style="list-style-type: none"> <li>✓ CAU level: income, employment and education deprivation and crime rate index</li> <li>✓ Individual level: age, education, marital status, living with children, household income, work-limiting illness, labour market status, residence type and commuting time</li> </ul>                        | <ul style="list-style-type: none"> <li>✓ It does not evaluate quality or use of GS</li> <li>✓ Participants have been living at least 1 year in the studied residence</li> <li>✓ Restricted to urban areas from England</li> <li>✓ Risk of lost-to-follow up of those with worse mental health</li> <li>✓ Gardens included</li> </ul>                                                      |
| Amoly 2014 <i>et al.</i> , Spain [2]      | Cross-sectional Children 7–10 y (N = 2111) | Quasi-Poisson mixed effects model     | <ul style="list-style-type: none"> <li>✓ CAU level: socioeconomic status</li> <li>✓ Individual level: gender, school level, ethnicity, preterm birth, breastfeeding, exposure to environmental tobacco smoke, maternal smoking during pregnancy, responding person, parental education, employment and marital status</li> </ul>            | <ul style="list-style-type: none"> <li>✓ It does not evaluate quality of GS</li> <li>✓ It takes into account use of GS</li> <li>✓ No mention of the minimal time of residence</li> <li>✓ School greenness evaluated</li> <li>✓ Restricted to urban areas</li> </ul>                                                                                                                       |
| Annerstedt <i>et al.</i> 2012, Sweden [3] | Longitudinal Adults 18–80 y (N = 9230)     | Logistic regression                   | <ul style="list-style-type: none"> <li>✓ Mental health of the first follow-up, age, financial stress, cohabitation status, country of origin</li> <li>✓ Interaction with physical activity</li> </ul>                                                                                                                                       | <ul style="list-style-type: none"> <li>✓ It evaluates quality of GS</li> <li>✓ Exclusion of people who changed residence</li> <li>✓ Individuals living in larger city centres excluded</li> <li>✓ Responders slightly higher education</li> <li>✓ Lost-to-follow up of those with worse mental health</li> </ul>                                                                          |
| Araya <i>et al.</i> 2007, Chile [4]       | Cross-sectional Adults 16–64 y (N = 3870)  | Multilevel linear/logistic regression | <ul style="list-style-type: none"> <li>✓ CAU level: episodes of violent crime reported to local police and general quality, facilities, and empty sites of the CAU</li> <li>✓ Individual level: age, gender, presence of disease, income, education, marital status, housing type, number of supportive individuals, alcohol use</li> </ul> | <ul style="list-style-type: none"> <li>✓ Exposure includes presence of public green areas and its state by creating a factor that includes both</li> <li>✓ It does not evaluate use of GS</li> <li>✓ No mention of the minimal time of residence</li> <li>✓ Socially deprived individuals less likely to participate</li> <li>✓ GS evaluated 4y after mental health assessment</li> </ul> |

Table S1. Cont.

| Author Country)                                  | (Year, Design/Population (N))                | Statistical Methods                | Co-Variables of Adjustment and Interactions Evaluated                                                                                                                                                                                                                                                                                                                                           | Other Information                                                                                                                                                                                                                                                                                                           |
|--------------------------------------------------|----------------------------------------------|------------------------------------|-------------------------------------------------------------------------------------------------------------------------------------------------------------------------------------------------------------------------------------------------------------------------------------------------------------------------------------------------------------------------------------------------|-----------------------------------------------------------------------------------------------------------------------------------------------------------------------------------------------------------------------------------------------------------------------------------------------------------------------------|
| Astell-Burt <i>et al.</i> 2013, Australia [5]    | Cross-sectional<br>>45 y (N = 260,061)       | Multilevel regression              | <ul style="list-style-type: none"> <li>✓ CAU level: socioeconomic index of the studied areas, urban vs remote areas</li> <li>✓ Individual level: social interactions, age, gender, ancestry, country of birth, language spoken at home, household income, education, economic status, couple status, smoking, alcohol consumption, BMI</li> <li>✓ Interaction with physical activity</li> </ul> | <ul style="list-style-type: none"> <li>✓ It does not evaluate quality of GS</li> <li>✓ No mention of the minimal time of residence</li> <li>✓ Agriculture land and private gardens excluded</li> </ul>                                                                                                                      |
| Astell-Burt <i>et al.</i> 2014, The UK [6]       | Longitudinal<br>>15 y (N = 65,407)           | Multilevel linear regression       | <ul style="list-style-type: none"> <li>✓ Age, gender, employment status, household tenure, marital status, education, marital status, smoking, household income</li> <li>✓ Interaction with age and gender</li> </ul>                                                                                                                                                                           | <ul style="list-style-type: none"> <li>✓ It does not evaluate quality or use of GS</li> <li>✓ Participants have been living at least 1 year in the studied residence</li> <li>✓ GS change over time taken into account</li> <li>✓ Only people living in urban neighbourhoods</li> <li>✓ Private gardens excluded</li> </ul> |
| Balseviciene <i>et al.</i> 2014, Lithuania [7]   | Cross-sectional<br>Children 4–6 y (N = 1468) | Non-hierarchical linear regression | <ul style="list-style-type: none"> <li>✓ Age, gender, parenting stress</li> <li>✓ Interaction with maternal education</li> </ul>                                                                                                                                                                                                                                                                | <ul style="list-style-type: none"> <li>✓ It does not evaluate quality or use of GS</li> <li>✓ No mention of the minimal time of residence</li> <li>✓ Only children from urban areas</li> </ul>                                                                                                                              |
| Beyer <i>et al.</i> 2014, The USA [8]            | Cross-sectional<br>21–74 y (N = 2479)        | Linear regression                  | <ul style="list-style-type: none"> <li>✓ CAU level: urbanicity, unemployment, instability, poverty, population density, education, housing tenure, % Afro-American, household income.</li> <li>✓ Individual level: age, gender, ethnicity, education, income, marital status and insurance status, length of residence in the neighbourhood</li> </ul>                                          | <ul style="list-style-type: none"> <li>✓ It does not evaluate quality or use of GS</li> <li>✓ No mention of the minimal time of residence</li> </ul>                                                                                                                                                                        |
| De Vries <i>et al.</i> 2003, The Netherlands [9] | Cross-sectional<br>All ages (N = 10,197)     | Logistic multilevel analysis       | <ul style="list-style-type: none"> <li>✓ CAU level: urbanity</li> <li>✓ Individual level: age, gender, education, number of rooms, type of health insurance, number of life-events</li> <li>✓ Interaction with education and urbanity degree</li> </ul>                                                                                                                                         | <ul style="list-style-type: none"> <li>✓ It does not evaluate quality or use of GS</li> <li>✓ Participants have been living at least 1 year in the studied residence</li> <li>✓ Exclusion of those with changes in urbanity in their neighbourhood</li> <li>✓ GS and health data collected at different moments</li> </ul>  |

Table S1. Cont.

| Author (Year, Country)                            | Study Design/Population (N)                         | Statistical Methods               | Co-Variables of Adjustment and Interactions Evaluated                                                                                                                                                                                                                                                                         | Other Information                                                                                                                                                                                                                                              |
|---------------------------------------------------|-----------------------------------------------------|-----------------------------------|-------------------------------------------------------------------------------------------------------------------------------------------------------------------------------------------------------------------------------------------------------------------------------------------------------------------------------|----------------------------------------------------------------------------------------------------------------------------------------------------------------------------------------------------------------------------------------------------------------|
| De Vries <i>et al.</i> 2013, The Netherlands [10] | Cross-sectional<br>All ages<br>(N = 1641)           | Multilevel analysis               | <ul style="list-style-type: none"> <li>✓ Individual level: gender, age, education, income, life events, children at home, smoking, excessive drinker</li> <li>✓ Mediation of stress, social cohesion and green and physical activity</li> </ul>                                                                               | <ul style="list-style-type: none"> <li>✓ Evaluates quality of GS</li> <li>✓ Partially evaluates use of GS</li> <li>✓ No mention of the minimal time of residence</li> <li>✓ Neighbourhoods with peculiar or extreme socioeconomic profiles excluded</li> </ul> |
| Duncan <i>et al.</i> 2013, The USA [11]           | Cross-sectional<br>Adolescents ~16 y<br>(N = 1170)  | Ordinary least squares regression | <ul style="list-style-type: none"> <li>✓ CAU level: school, % Black &amp; Hispanics, households below poverty, % born outside the buffer</li> <li>✓ Individual level: race/ethnicity, gender, age, nativity, family structure</li> <li>✓ Interaction with gender and ethnicity</li> </ul>                                     | <ul style="list-style-type: none"> <li>✓ It does not evaluate quality or use of GS</li> <li>✓ No mention of the minimal time of residence</li> </ul>                                                                                                           |
| Fan <i>et al.</i> 2011, The USA [12]              | Cross-sectional<br>Adults 18–75 y<br>(N = 1544)     | Linear regression                 | <ul style="list-style-type: none"> <li>✓ Individual level: gender, age, ethnicity, education, household income, employment status, marital status, number of children, physical activity, social support</li> </ul>                                                                                                           | <ul style="list-style-type: none"> <li>✓ It does not evaluate quality or use of GS</li> <li>✓ No mention of the minimal time of residence</li> <li>✓ Years that participants have been living in the area</li> </ul>                                           |
| Flouri <i>et al.</i> 2014, The UK [13]            | Longitudinal<br>Children 3 & 7 y<br>(N = 6384)      | Mixed model                       | <ul style="list-style-type: none"> <li>✓ CAU level: deprivation</li> <li>✓ Individual level: age, gender, ethnicity, socio-economic status, adverse life events, maternal education, marital status parents, garden access</li> <li>✓ Interaction with socioeconomic status</li> </ul>                                        | <ul style="list-style-type: none"> <li>✓ It does not evaluate quality of GS</li> <li>✓ No mention of the minimal time of residence</li> <li>✓ Exclusion of private gardens</li> <li>✓ Rural areas excluded</li> </ul>                                          |
| Francis <i>et al.</i> 2012, Australia [14]        | Cross-sectional<br>Adults 20–79 y<br>(N = 911)      | Logistic regression               | <ul style="list-style-type: none"> <li>✓ CAU level: crime (self-reported), socioeconomic status</li> <li>✓ Individual level: gender, age, marital status, children at home, education, work status, hours worked, BMI, life events, participation in social groups, social network and support, sense of community</li> </ul> | <ul style="list-style-type: none"> <li>✓ Evaluates quality and use of GS</li> <li>✓ Participants have been living at least 1 year in the studied residence</li> </ul>                                                                                          |
| Maas <i>et al.</i> 2009, The Netherlands [15]     | Cross-sectional<br>12 to >65 y<br>(N = 4842–10,089) | Multilevel logistic regression    | <ul style="list-style-type: none"> <li>✓ CAU level: urbanicity</li> <li>✓ Individual level: age, gender, household size, education, household income</li> <li>✓ Mediation analyses with social support</li> </ul>                                                                                                             | <ul style="list-style-type: none"> <li>✓ It does not evaluate quality or use of GS</li> <li>✓ No mention of the minimal time of residence</li> <li>✓ Gardens and small GS excluded</li> </ul>                                                                  |
| Maas <i>et al.</i> 2009, The Netherlands [16]     | Cross-sectional<br>All ages (N = 345,143)           | Multilevel logistic regression    | <ul style="list-style-type: none"> <li>✓ CAU level: urbanicity</li> <li>✓ Individual level: age, gender, education, health insurance, work situation</li> <li>✓ Interaction with age, socioeconomic status, urbanicity</li> </ul>                                                                                             | <ul style="list-style-type: none"> <li>✓ It does not evaluate quality or use of GS</li> <li>✓ Participants have been living at least 1 year in the studied residence</li> <li>✓ Small GS excluded if not predominant</li> </ul>                                |

Table S1. Cont.

| Author (Year, Country)                          | Study Design/Population (N)           | Statistical Methods            | Co-Variables of Adjustment and Interactions Evaluated                                                                                                                                                                                                                                         | Other Information                                                                                                                                                                                                                                                                        |
|-------------------------------------------------|---------------------------------------|--------------------------------|-----------------------------------------------------------------------------------------------------------------------------------------------------------------------------------------------------------------------------------------------------------------------------------------------|------------------------------------------------------------------------------------------------------------------------------------------------------------------------------------------------------------------------------------------------------------------------------------------|
| Markevych <i>et al.</i> 2014, Germany [17]      | Cross-sectional<br>10 y (N = 1932)    | Logistic regression            | <ul style="list-style-type: none"> <li>✓ Individual level: age, gender, parental education, maternal age at birth, civil status, time in front of a screen, time spent outdoors</li> <li>✓ Interaction with gender and urbanicity</li> <li>✓ Mediation analysis: physical activity</li> </ul> | <ul style="list-style-type: none"> <li>✓ It does not evaluate quality or use of GS</li> <li>✓ Sensitivity analyses excluding GS &gt;5000m<sup>2</sup></li> <li>✓ Participants have been living at least 1 year in the studied residence</li> </ul>                                       |
| Nutsford <i>et al.</i> 2013, New Zealand [18]   | Ecological<br>>15 y (N = 319,521)     | Negative binomial regression   | <ul style="list-style-type: none"> <li>✓ CAU level: deprivation levels (derived from nine variables)</li> </ul>                                                                                                                                                                               | <ul style="list-style-type: none"> <li>✓ It does not evaluate quality or use of GS</li> <li>✓ No mention of the minimal time of residence</li> </ul>                                                                                                                                     |
| Reklaitiene <i>et al.</i> 2014, Lithuania [19]  | Cross-sectional<br>45–72 y (N = 7161) | Logistic regression            | <ul style="list-style-type: none"> <li>✓ Individual level: age, marital status, education, smoking, use of alcohol, BMI</li> <li>✓ Interaction with age, gender, park use</li> </ul>                                                                                                          | <ul style="list-style-type: none"> <li>✓ It does not evaluate quality of GS</li> <li>✓ Evaluates use of GS</li> <li>✓ No mention of the minimal time of residence</li> </ul>                                                                                                             |
| Richardson <i>et al.</i> 2013, New Zealand [20] | Cross-sectional<br>>15 y (N = 8157)   | Multilevel logistic regression | <ul style="list-style-type: none"> <li>✓ Individual level: gender, age, smoking, index of socio-economic deprivation</li> <li>✓ Interaction with physical activity</li> </ul>                                                                                                                 | <ul style="list-style-type: none"> <li>✓ It does not evaluate quality or use of GS</li> <li>✓ No mention of the minimal time of residence</li> <li>✓ Rural areas excluded</li> </ul>                                                                                                     |
| Roe <i>et al.</i> 2013, The UK [21]             | Cross-sectional<br>33–55 y (N = ~100) | Linear regression              | <ul style="list-style-type: none"> <li>✓ Individual level: age, gender, deprivation level, access to gardens</li> </ul>                                                                                                                                                                       | <ul style="list-style-type: none"> <li>✓ It does not evaluate quality or use of GS</li> <li>✓ Participants have been living at least 1 year in the studied residence</li> <li>✓ Non-working adults from socio-economically deprived areas</li> <li>✓ Private gardens excluded</li> </ul> |
| Sarkar <i>et al.</i> 2013, The UK [22]          | Cross-sectional<br>65–84 y (N = 687)  | Multilevel logistic regression | <ul style="list-style-type: none"> <li>✓ CAU level: deprivation</li> <li>✓ Individual level: age, alcohol consumption, social class, education, chronic vascular comorbidities</li> </ul>                                                                                                     | <ul style="list-style-type: none"> <li>✓ Partial evaluation of quality of GS</li> <li>✓ It does not evaluate use of GS</li> <li>✓ No mention of the minimal time of residence</li> </ul>                                                                                                 |
| Sturm <i>et al.</i> 2014, The USA [23]          | Cross-sectional<br>Adults (N = 1070)  | Hierarchical linear regression | <ul style="list-style-type: none"> <li>✓ Individual level: age, gender, BMI, overall health status, unemployment</li> <li>✓ Mediation analysis: physical activity, park frequency</li> </ul>                                                                                                  | <ul style="list-style-type: none"> <li>✓ It does not evaluate quality of GS</li> <li>✓ Evaluates use of GS</li> <li>✓ No mention of the minimal time of residence</li> <li>✓ Seasonal effects and regional unemployment rates assessed</li> </ul>                                        |

Table S1. Cont.

| Author (Year, Country)                               | Study Design/Population (N)                   | Statistical Methods            | Co-Variables of Adjustment and Interactions Evaluated                                                                                                                                                                                                                                                                                         | Other Information                                                                                                                                                                                                                                                    |
|------------------------------------------------------|-----------------------------------------------|--------------------------------|-----------------------------------------------------------------------------------------------------------------------------------------------------------------------------------------------------------------------------------------------------------------------------------------------------------------------------------------------|----------------------------------------------------------------------------------------------------------------------------------------------------------------------------------------------------------------------------------------------------------------------|
| Triguero-Mas <i>et al.</i> 2015, Spain [24]          | Cross-sectional<br>34–64 y<br>(N = 8793)      | Logistic regressions           | <ul style="list-style-type: none"> <li>✓ Individual level: gender, age, education level, birth place, type of health insurance, marital status, and indicators of household and neighbourhood socioeconomic status. Degree of urbanization as an effect modifier.</li> <li>✓ Mediation analysis: social support, physical activity</li> </ul> | <ul style="list-style-type: none"> <li>✓ It does not evaluate quality of GS</li> <li>✓ It does not evaluate use of GS</li> <li>✓ No mention of the minimal time of residence</li> </ul>                                                                              |
| Van den Berg <i>et al.</i> 2010, The Netherlands[25] | Cross-sectional<br>>18 y (N = 4529)           | Multilevel linear regression   | <ul style="list-style-type: none"> <li>✓ CAU level: level of urbanity</li> <li>✓ Individual level: age, gender, education, income</li> <li>✓ Interaction with physical activity stressful life events</li> </ul>                                                                                                                              | <ul style="list-style-type: none"> <li>✓ It does not evaluate quality or use of GS</li> <li>✓ Participants have been living at least 1 year in the studied residence</li> <li>✓ Interviews performed across the four seasons</li> <li>✓ Small GS excluded</li> </ul> |
| Weich <i>et al.</i> 2002, The UK [26]                | Cross-sectional<br>Adults >16 y<br>(N = 1896) | Linear logistic regression and | <ul style="list-style-type: none"> <li>✓ Individual level: age, gender, marital status, employment status, education, housing tenure, car access, ethnicity</li> </ul>                                                                                                                                                                        | <ul style="list-style-type: none"> <li>✓ It does not evaluate quality or use of GS</li> <li>✓ Only number of trees or private gardens evaluated</li> <li>✓ Years that participants have been living in the area</li> </ul>                                           |
| White <i>et al.</i> 2013, The UK [27]                | Longitudinal<br>Adults (N = 12,818)           | Fixed-effects regression       | <ul style="list-style-type: none"> <li>✓ CAU level: income, employment, education, crime</li> <li>✓ Individual level: age, education, marital status, living with children, work-limiting health status, labourmarket status, residence type, household space, commute length</li> </ul>                                                      | <ul style="list-style-type: none"> <li>✓ It does not evaluate quality or use of GS</li> <li>✓ Participants have been living at least 1 year in the studied residence</li> <li>✓ Only urban areas included</li> <li>✓ Gardens included</li> </ul>                     |
| White <i>et al.</i> 2013, The UK [28]                | Longitudinal<br>Adults (N = 15,361)           | Fixed-effects regression       | <ul style="list-style-type: none"> <li>✓ Individual level: age, education, marital status, living with children, work-limiting health status, labourmarket status, residence type, household space, commute length, green space</li> </ul>                                                                                                    | <ul style="list-style-type: none"> <li>✓ It does not evaluate quality or use of blue spaces</li> </ul>                                                                                                                                                               |

CAU level: Census area unit level, GS: green space, BMI: body mass index.

**Table S2.** Criteria for quality assessment of the studies.

|                                                                   |                                                                                                                                                                                                                   |
|-------------------------------------------------------------------|-------------------------------------------------------------------------------------------------------------------------------------------------------------------------------------------------------------------|
| Study design                                                      | 0 = ecological, 1 = cross-sectional, 2 = longitudinal                                                                                                                                                             |
| Confounding factors                                               | 0 = no confounding factors considered, 1 = confounding factors considered but some key confounders omitted, 2 = careful consideration of confounders                                                              |
| Statistics                                                        | 0 = flaws in or inappropriate statistical testing or interpretation of statistical tests that may have affected results, 1 = appropriate statistical testing and interpretation of tests                          |
| Potential bias                                                    | 0 = other study design or conduct issues that may have led to bias, 1 = no other serious study flaws                                                                                                              |
| Multiplicity                                                      | 0 = exposure of interest one of the many variables being tested, 1 = exposure of interest the main variable tested                                                                                                |
| Outcome assessment                                                | 0 = self-reported questionnaires, 1 = interviews conducted by experts or clinical records or other objective measures (biomarkers such as cortisol) that support the results of the mental health tests conducted |
| Green exposure assessment                                         | 0 = expert assessment (audit), 1 = satellite system or land-cover map                                                                                                                                             |
| Use of green space                                                | 0 = not measured and/or not included in the analysis, 1 = measured and included in the analysis                                                                                                                   |
| Quality of green space (as confounder)                            | 0 = no, 1 = yes, but partially, 2 = yes, and measured with an assessment tool                                                                                                                                     |
| Effect size                                                       | 0 = incomplete information, 1 = complete information (estimate and standard error or confidence interval).                                                                                                        |
| Participants have been living at least 1 year in the studied area | 0 = no or not clearly specified, 1 = yes                                                                                                                                                                          |

**Table S3.** Specific scores for each item evaluated and the final quality scores and categories given to each study.

|                                                   | Study Design | Confounding Factors | Statistics | Potential Bias | Multiplicity | Outcome Assessment | GS/BS Assessment | Use of GS/BS | Quality of GS/BS | Effect Size | At least 1y Living in the Area | Score (Absolute Number) <sup>a</sup> | Score (%) <sup>a</sup> | Quality Category |
|---------------------------------------------------|--------------|---------------------|------------|----------------|--------------|--------------------|------------------|--------------|------------------|-------------|--------------------------------|--------------------------------------|------------------------|------------------|
| Alcock <i>et al.</i> 2014, The UK [1]             | 2            | 2                   | 1          | 0              | 1            | 0                  | 1                | 0            | 0                | 1           | 1                              | 9                                    | 64                     | Good             |
| Amoly 2014 <i>et al.</i> , Spain [2]              | 1            | 2                   | 1          | 0              | 0            | 0                  | 1                | 1            | 0                | 1           | 0                              | 7                                    | 50                     | Fair             |
| Annerstedt <i>et al.</i> 2012, Sweden [3]         | 2            | 1                   | 1          | 0              | 0            | 0                  | 0                | 0            | NA <sup>a</sup>  | 0           | 1                              | 5                                    | 42                     | Fair             |
| Araya <i>et al.</i> 2007, Chile [4]               | 1            | 2                   | 1          | 0              | 1            | 1                  | 0                | 0            | 0                | 1           | 0                              | 7                                    | 50                     | Fair             |
| Astell-Burt <i>et al.</i> 2013, Australia [5]     | 1            | 2                   | 1          | 1              | 1            | 0                  | 1                | 0            | 0                | 1           | 0                              | 8                                    | 57                     | Fair             |
| Astell-Burt <i>et al.</i> 2014, The UK [6]        | 2            | 2                   | 1          | 1              | 1            | 0                  | 1                | 0            | 0                | 1           | 1                              | 10                                   | 71                     | Good             |
| Balseviciene <i>et al.</i> 2014, Lithuania [7]    | 1            | 1                   | 1          | 1              | 1            | 0                  | 1                | 0            | 0                | 0           | 0                              | 6                                    | 43                     | Fair             |
| Beyer <i>et al.</i> 2014, The USA [8]             | 1            | 2                   | 1          | 0              | 1            | 0                  | 1                | 0            | 0                | 1           | 0                              | 7                                    | 50                     | Fair             |
| De Vries <i>et al.</i> 2003, The Netherlands [9]  | 1            | 2                   | 1          | 0              | 0            | 0                  | 1                | 0            | 0                | 0           | 1                              | 6                                    | 43                     | Fair             |
| De Vries <i>et al.</i> 2013, The Netherlands [10] | 1            | 2                   | 0          | 0              | 1            | 0                  | 0                | 0            | NA <sup>a</sup>  | 1           | 0                              | 5                                    | 42                     | Fair             |
| Duncan <i>et al.</i> 2013, The USA [11]           | 1            | 1                   | 0          | 1              | 0            | 0                  | 1                | 0            | 0                | 1           | 0                              | 5                                    | 36                     | Poor             |
| Fan <i>et al.</i> 2011, The USA [12]              | 1            | 2                   | 1          | 0              | 0            | 0                  | 1                | 0            | 0                | 0           | 0                              | 5                                    | 36                     | Poor             |

Table S3. Cont.

|                                                 | Study Design | Confounding Factors | Statistics | Potential Bias | Multiplicity | Outcome Assessment | GS/BS Assessment | Use of GS/BS | Quality of GS/BS | Effect Size | At least 1y Living in the Area | Score (Absolute Number) <sup>a</sup> | Score (%) <sup>a</sup> | Quality Category |
|-------------------------------------------------|--------------|---------------------|------------|----------------|--------------|--------------------|------------------|--------------|------------------|-------------|--------------------------------|--------------------------------------|------------------------|------------------|
| Flouri <i>et al.</i> 2014, The UK [13]          | 2            | 2                   | 1          | 0              | 1            | 0                  | 1                | 0            | 0                | 1           | 0                              | 8                                    | 57                     | Fair             |
| Francis <i>et al.</i> 2012, Australia [14]      | 1            | 2                   | 1          | 1              | 0            | 0                  | 1                | 0            | 2                | 0           | 1                              | 9                                    | 64                     | Good             |
| Maas <i>et al.</i> 2009, The Netherlands [15]   | 1            | 2                   | 1          | 1              | 1            | 0                  | 1                | 0            | 0                | 0           | 1                              | 8                                    | 57                     | Fair             |
| Maas <i>et al.</i> 2009, The Netherlands [16]   | 1            | 2                   | 1          | 1              | 1            | 1                  | 1                | 0            | 0                | 1           | 1                              | 10                                   | 71                     | Good             |
| Markevych <i>et al.</i> 2014, Germany [17]      | 1            | 2                   | 1          | 0              | 1            | 0                  | 1                | 0            | 0                | 1           | 1                              | 8                                    | 57                     | Fair             |
| Nutsford <i>et al.</i> 2013, New Zealand [18]   | 0            | 1                   | 1          | 1              | 0            | 1                  | 1                | 0            | 0                | 1           | 0                              | 6                                    | 43                     | Fair             |
| Reklaitiene <i>et al.</i> 2014, Lithuania [19]  | 1            | 1                   | 1          | 1              | 1            | 0                  | 1                | 1            | 0                | 1           | 0                              | 8                                    | 57                     | Fair             |
| Richardson <i>et al.</i> 2013, New Zealand [20] | 1            | 1                   | 1          | 1              | 1            | 0                  | 1                | 0            | 0                | 1           | 0                              | 7                                    | 50                     | Fair             |
| Roe <i>et al.</i> 2013, The UK [21]             | 1            | 1                   | 1          | 0              | 0            | 1                  | 1                | 0            | 0                | 1           | 1                              | 7                                    | 50                     | Fair             |
| Sarkar <i>et al.</i> 2013, The UK [22]          | 1            | 2                   | 1          | 1              | 0            | 0                  | 1                | 0            | 1                | 0           | 0                              | 7                                    | 50                     | Fair             |
| Sturm <i>et al.</i> 2014, The USA [23]          | 1            | 1                   | 1          | 0              | 1            | 0                  | 0                | 1            | 0                | 1           | 0                              | 6                                    | 43                     | Fair             |
| Triguero-Mas <i>et al.</i> 2015, Spain [24]     | 1            | 2                   | 1          | 1              | 0            | 0                  | 1                | 0            | 0                | 1           | 0                              | 7                                    | 50                     | Fair             |

Table S3. Cont.

|                                                       | Study Design | Confounding Factors | Statistics | Potential Bias | Multiplicity | Outcome Assessment | GS/BS Assessment | Use of GS/BS | Quality of GS/BS | Effect Size | At least 1y Living in the Area | Score (Absolute Number) <sup>a</sup> | Score (%) <sup>a</sup> | Quality Category |
|-------------------------------------------------------|--------------|---------------------|------------|----------------|--------------|--------------------|------------------|--------------|------------------|-------------|--------------------------------|--------------------------------------|------------------------|------------------|
| Van den Berg <i>et al.</i> 2010, The Netherlands [25] | 1            | 1                   | 1          | 1              | 1            | 0                  | 1                | 0            | 0                | 0           | 1                              | 7                                    | 50                     | Fair             |
| Weich <i>et al.</i> 2002, The UK [26]                 | 1            | 1                   | 1          | 1              | 0            | 0                  | 0                | 0            | 0                | 1           | 1                              | 6                                    | 43                     | Fair             |
| White <i>et al.</i> 2013, The UK [27]                 | 2            | 2                   | 1          | 1              | 0            | 0                  | 1                | 0            | 0                | 1           | 1                              | 9                                    | 64                     | Good             |
| White <i>et al.</i> 2013, The UK [28]                 | 2            | 2                   | 1          | 1              | 0            | 0                  | 1                | 0            | 0                | 1           | 0                              | 8                                    | 57                     | Fair             |

GS/BS: green space or blue space (depending on the studied exposure in each study); <sup>a</sup>For each study the total score was calculated by adding the scores on the 11 dimensions and expressing them as a percentage of the maximum score, which was 14, except for two studies [11,12] in which the inclusion of quality of green spaces as a confounder did not make sense as the main exposure of interest was the quality of green spaces (maximum score = 12). Afterwards, five categories were created to define the quality of each study: *excellent quality* (score  $\geq 81\%$ ), *good quality* (between 61 and 80%), *fair quality* (between 41 and 60%), *poor quality* (between 21 and 40%) and *very poor quality* ( $\leq 20\%$ ).

## References

1. Alcock, I.; White, M.P.; Wheeler, B.W.; Fleming, L.E.; Depledge, M.H. Longitudinal effects on mental health of moving to greener and less green urban areas. *Environ. Sci. Technol.* **2014**, *48*, 1247–1255.
2. Amoly, E.; Dadvand, P.; Forns, J.; López-Vicente, M.; Basagaña, X.; Julvez, J.; Alvarez-Pedrerol, M.; Nieuwenhuijsen, M.J.; Sunyer, J. Green and Blue Spaces and Behavioral Development in Barcelona Schoolchildren: The BREATHE Project. *Environ. Health Perspect.* **2014**, doi:10.1289/ehp.1408215.
3. Annerstedt, M.; Ostergren, P.-O.; Björk, J.; Grahn, P.; Skärbäck, E.; Währborg, P. Green qualities in the neighbourhood and mental health-results from a longitudinal cohort study in Southern Sweden. *BMC Public Health* **2012**, *12*, doi: 10.1186/1471-2458-12-337.
4. Araya, R.; Montgomery, A.; Rojas, G.; Fritsch, R.; Solis, J.; Signorelli, A.; Lewis, G. Common mental disorders and the built environment in Santiago, Chile. *Br. J. Psychiatr.* **2007**, *190*, 394–401.
5. Astell-Burt, T.; Feng, X.; Kolt, G.S. Mental health benefits of neighbourhood green space are stronger among physically active adults in middle-to-older age: Evidence from 260,061 Australians. *Prev. Med. (Baltim.)* **2013**, *57*, 601–606.
6. Astell-Burt, T.; Mitchell, R.; Hartig, T. The association between green space and mental health varies across the lifecourse. A longitudinal study. *J. Epidemiol. Commun. Health* **2014**, *68*, 578–583.
7. Balseviciene, B.; Sinkariova, L.; Grazuleviciene, R.; Andrusaityte, S.; Uzdanaviciute, I.; Dedele, A.; Nieuwenhuijsen, M.J. Impact of residential greenness on preschool children's emotional and behavioral problems. *Int. J. Environ. Res. Public Health* **2014**, *11*, 6757–6770.
8. Beyer, K.M. M.; Kaltenbach, A.; Szabo, A.; Bogar, S.; Nieto, F.J.; Malecki, K.M. Exposure to neighborhood green space and mental health: Evidence from the survey of the health of Wisconsin. *Int. J. Environ. Res. Public Health* **2014**, *11*, 3453–3472.
9. De Vries, S.; Verheij, R.A.; Groenewegen, P.P.; Spreeuwenberg, P. Natural environments—Healthy environments? An exploratory analysis of the relationship between greenspace and health. *Environ. Plan. A* **2003**, *35*, 1717–1731.
10. De Vries, S.; van Dillen, S.M.E.; Groenewegen, P.P.; Spreeuwenberg, P. Streetscape greenery and health: Stress, social cohesion and physical activity as mediators. *Soc. Sci. Med.* **2013**, *94*, 26–33.
11. Duncan, D.T.; Piras, G.; Dunn, E.C.; Johnson, R.M.; Melly, S.J.; Molnar, B.E. The built environment and depressive symptoms among urban youth: A spatial regression study. *Spat. Spatiotemporal. Epidemiol.* **2013**, *5*, 11–25.
12. Fan, Y.; Das, K. V.; Chen, Q. Neighborhood green, social support, physical activity, and stress: Assessing the cumulative impact. *Health Place* **2011**, *17*, 1202–1211.
13. Flouri, E.; Midouhas, E.; Joshi, H. The role of urban neighbourhood green space in children's emotional and behavioural resilience. *J. Environ. Psychol.* **2014**, *40*, 179–186.
14. Francis, J.; Wood, L.J.; Knuiman, M.; Giles-Corti, B. Quality or quantity? Exploring the relationship between Public Open Space attributes and mental health in Perth, Western Australia. *Soc. Sci. Med.* **2012**, *74*, 1570–1577.

15. Maas, J.; van Dillen, S.M. E.; Verheij, R.A.; Groenewegen, P.P. Social contacts as a possible mechanism behind the relation between green space and health. *Health Place* **2009**, *15*, 586–595.
16. Maas, J.; Verheij, R.A.; de Vries, S.; Spreeuwenberg, P.; Schellevis, F.G.; Groenewegen, P.P. Morbidity is related to a green living environment. *J. Epidemiol. Commun. Health* **2009**, *63*, 967–973.
17. Markevych, I.; Tiesler, C.M. T.; Fuertes, E.; Romanos, M.; Dadvand, P.; Nieuwenhuijsen, M.J.; Berdel, D.; Koletzko, S.; Heinrich, J. Access to urban green spaces and behavioural problems in children: Results from the GINIplus and LISApplus studies. *Environ. Int.* **2014**, *71*, 29–35.
18. Nutsford, D.; Pearson, A.L.; Kingham, S. An ecological study investigating the association between access to urban green space and mental health. *Public Health* **2013**, *127*, 1005–1011.
19. Reklaitiene, R.; Grazuleviciene, R.; Dedele, A.; Virviciute, D.; Vensloviene, J.; Tamosiunas, A.; Baceviciene, M.; Luksiene, D.; Sapranaviciute-Zabazlajeva, L.; Radisauskas, R.; *et al.* The relationship of green space, depressive symptoms and perceived general health in urban population. *Scand. J. Public Health* **2014**, doi:10.1177/1403494814544494.
20. Richardson, E.A.; Pearce, J.; Mitchell, R.; Kingham, S. Role of physical activity in the relationship between urban green space and health. *Public Health* **2013**, *127*, 318–324.
21. Roe, J.J.; Thompson, C.W.; Aspinall, P.A.; Brewer, M.J.; Duff, E.I.; Miller, D.; Mitchell, R.; Clow, A. Green space and stress: Evidence from cortisol measures in deprived urban communities. *Int. J. Environ. Res. Public Health* **2013**, *10*, 4086–4103.
22. Sarkar, C.; Gallacher, J.; Webster, C. Urban built environment configuration and psychological distress in older men: Results from the Caerphilly study. *BMC Public Health* **2013**, *13*, doi:10.1186/1471-2458-13-695.
23. Sturm, R.; Cohen, D. Proximity to urban parks and mental health. *J. Ment. Health Policy Econ.* **2014**, *17*, 19–24.
24. Triguero-Mas, M.; Dadvand, P.; Cirach, M.; Martínez, D.; Medina, A.; Mompart, A.; Basagaña, X.; Gražulevičienė, R.; Nieuwenhuijsen, M.J. Natural outdoor environments and mental and physical health: Relationships and mechanisms. *Environ. Int.* **2015**, *77*, 35–41.
25. Van den Berg, A.E.; Maas, J.; Verheij, R.A.; Groenewegen, P.P. Green space as a buffer between stressful life events and health. *Soc. Sci. Med.* **2010**, *70*, 1203–1210.
26. Weich, S.; Blanchard, M.; Prince, M.; Burton, E.; Erens, B.; Sproston, K. Mental health and the built environment: Cross-sectional survey of individual and contextual risk factors for depression. *Br. J. Psychiatry* **2002**, *180*, 428–433.
27. White, M.P.; Alcock, I.; Wheeler, B.W.; Depledge, M.H. Would you be happier living in a greener urban area? A fixed-effects analysis of panel data. *Psychol. Sci.* **2013**, *24*, 920–928.
28. White, M.P.; Alcock, I.; Wheeler, B.W.; Depledge, M.H. Coastal proximity, health and well-being: Results from a longitudinal panel survey. *Health Place* **2013**, *23*, 97–103.
